# Supplementary material for: Women’s health and well-being in five birth cohorts from low- and middle-income countries: Domains and their associations with early-life conditions
Source: PubMed Central journal article supplement (PMC11327850; doi:10.7189/jogh.14.04137), 2024-08-16
Supplement: jogh-14-04137-s001.pdf [file jogh-14-04137-s001.pdf]

## Supplementary Material

### Table of contents

|                                                                                                                                                                                          |    |
|------------------------------------------------------------------------------------------------------------------------------------------------------------------------------------------|----|
| Table S1. Mean age (years) at outcome measurement, by cohort.....                                                                                                                        | 2  |
| Table S2. Covariates used in the adjusted analyses. ....                                                                                                                                 | 3  |
| Table S3. Number of women with information on adult outcomes, by cohort. ....                                                                                                            | 4  |
| Table S4. Summary of findings on effect sizes and 95% confidence intervals. ....                                                                                                         | 5  |
| Figure S1. Histograms showing distributions of the eight indicators in the five cohorts. The vertical axis indicates the number of individuals in each range. ....                       | 6  |
| Figure S2. Pairwise Pearson correlation coefficients among outcome variables. ....                                                                                                       | 7  |
| Figure S3. Pairwise Pearson correlation coefficients of wellbeing components from pooled analyses with outcomes, based on three separate PCA models.....                                 | 8  |
| Figure S4. Overlap of women classified in the upper tercile of each wellbeing component in the pooled analyses. ....                                                                     | 9  |
| Figure S5. Pairwise Pearson correlation coefficients of wellbeing components from pooled analyses with outcomes, based on a single PCA model including the eight outcome variables. .... | 10 |
| Figure S6. Pairwise Pearson correlation coefficients between wellbeing components from pooled (p) and cohort-specific (c) analyses.....                                                  | 11 |

**Table S1. Mean age (years) at outcome measurement, by cohort.**

| Trait               | Cebu | Guatemala <sup>A</sup> | Pelotas 1982 | Pelotas 1993 | Soweto |
|---------------------|------|------------------------|--------------|--------------|--------|
| IQ                  | 34   | 40-57                  | 30           | 18           | 28     |
| Schooling           | 34   | 40-57                  | 30           | 22           | 28     |
| Height              | 21   | 38-55                  | 30           | 22           | 22     |
| Weight              | 34   | 38-55                  | 30           | 22           | 22     |
| Waist circumference | 34   | 38-55                  | 30           | 22           | 22     |
| Blood pressure      | 34   | 38-55                  | 30           | 22           | 22     |
| Triglycerides       | 21   | 38-55                  | 30           | 22           | 22     |
| Plasma glucose      | 21   | 38-55                  | 30           | 22           | 22     |
| HDL cholesterol     | 21   | 38-55                  | 30           | 22           | 22     |
| SRQ                 | 34   | 40-57                  | 30           | 22           | 28     |
| Happiness           | 34   | 40-57                  | 30           | 18           | 28     |

<sup>A</sup>Given the high variability in age in this cohort, the range rather than the mean is shown.

**Table S2. Covariates used in the adjusted analyses.**

| Exposure                                  | Covariates <sup>A,B</sup>                                              |
|-------------------------------------------|------------------------------------------------------------------------|
| Wealth/income                             | Maternal age, maternal schooling, paternal schooling                   |
| Maternal education                        | Maternal age, wealth/income                                            |
| Maternal height                           | 1: Maternal age, maternal schooling, paternal schooling, wealth/income |
| Birth order                               | 2: 1 + maternal height                                                 |
| Water facilities                          | 2 + toilet facilities                                                  |
| Toilet facilities                         | 2 + water facilities                                                   |
| Birth weight                              | 3: birth order + water facilities + toilet facilities                  |
| Length in early childhood                 | 4: 3 + birth weight                                                    |
| Weight in early childhood                 | 5: 4 + length in early childhood                                       |
| Cognitive development in middle childhood | 6: 5 + weight in early childhood                                       |

<sup>A</sup>In both Pelotas cohorts, skin color was also included as a covariate.

<sup>B</sup>In Guatemala, year of birth and intervention status were included as covariates in both minimally-adjusted (which we refer to as “crude” in the main text for simplicity) and fully-adjusted analyses.

**Table S3. Number of women with information on adult outcomes, by cohort.**

| <b>Trait</b>         | <b>Cebu</b> | <b>Guatemala</b> | <b>Pelotas 1982</b> | <b>Pelotas 1993</b> | <b>Soweto</b> |
|----------------------|-------------|------------------|---------------------|---------------------|---------------|
| IQ                   | 612         | 749              | 1872                | 2070                | 734           |
| Schooling            | 847         | 774              | 1883                | 2027                | 730           |
| Height               | 958         | 812              | 2231                | 1889                | 772           |
| Teenage childbearing | 931         | 778              | 1856                | 2091                | 888           |
| BMI                  | 593         | 689              | 1798                | 1875                | 764           |
| Metabolic syndrome   | 482         | 675              | 1778                | 1814                | 633           |
| SRQ                  | 611         | 705              | 1884                | 2017                | 737           |
| Happiness            | 611         | 700              | 1885                | 2091                | 733           |

**Table S4. Summary of findings on effect sizes and 95% confidence intervals.**

| Exposure                                  | Model    | Human capital      | Metabolic health     | Psychological health |
|-------------------------------------------|----------|--------------------|----------------------|----------------------|
| Wealth/income quintiles at birth          | Crude    | Strong             | Weak to Strong       | Moderate to Strong   |
|                                           | Adjusted | Weak to Strong     | Weak to Strong       | Strong to Weak       |
| Wealth/income quintiles at birth (trend)  | Crude    | Weak to Strong     | Weak to Moderate     | Weak to Moderate     |
|                                           | Adjusted | Weak to Moderate   | Weak to Weak         | Weak to Weak         |
| Maternal schooling                        | Crude    | Strong             | Weak to Moderate     | Weak to Moderate     |
|                                           | Adjusted | Strong             | Weak to Weak         | Weak to Moderate     |
| Maternal height                           | Crude    | Moderate to Strong | Weak to Weak         | Weak to Weak         |
|                                           | Adjusted | Moderate           | Weak                 | Weak to Weak         |
| Water facilities at birth                 | Crude    | Strong             | Weak to Strong       | Weak to Strong       |
|                                           | Adjusted | Moderate to Strong | Moderate to Strong   | Weak to Strong       |
| Toilet facilities at birth                | Crude    | Strong             | Strong to Strong     | Strong to Strong     |
|                                           | Adjusted | Weak to Strong     | Strong to Moderate   | Strong to Strong     |
| Birth order                               | Crude    | Strong             | Weak to Weak         | Moderate to Weak     |
|                                           | Adjusted | Moderate to Strong | Weak to Strong       | Strong to Weak       |
| Birth order (trend)                       | Crude    | Weak to Strong     | Weak to Weak         | Weak to Weak         |
|                                           | Adjusted | Weak to Strong     | Weak to Weak         | Weak to Moderate     |
| Birth weight                              | Crude    | Moderate to Strong | Weak to Moderate     | Weak to Weak         |
|                                           | Adjusted | Weak to Moderate   | Weak to Moderate     | Weak to Weak         |
| Length in early childhood                 | Crude    | Strong             | Weak to Weak         | Weak to Moderate     |
|                                           | Adjusted | Weak to Strong     | Moderate to Moderate | Weak                 |
| Weight in early childhood                 | Crude    | Moderate to Strong | Weak to Strong       | Weak                 |
|                                           | Adjusted | Weak to Strong     | Strong to Weak       | Moderate to Moderate |
| Cognitive development in middle childhood | Crude    | Strong             | Weak to Moderate     | Weak to Weak         |
|                                           | Adjusted | Moderate to Strong | Weak to Strong       | Weak to Strong       |

Notes: **Blue** indicates positive, and **red** indicates negative associations. The terms *weak*, *moderate* and *strong* indicate the confidence limits of the associations. For binary exposures (water and toilet facilities), *weak* implies that the confidence limit of the mean difference (in standard deviation units (SD) of the outcome) was between 0 and 0.1 (in absolute value); *moderate* if between 0.1 and 0.2; and *strong* if greater than 0.2. For categorical exposures (wealth/income quintiles and birth order), the same criteria were applied for the comparisons: 1<sup>st</sup> and 5<sup>th</sup> quintiles; and 1 and  $\geq 4$  birth order rank. For all other exposures, which are numeric, the same criteria were applied to effect estimates expressed as SD changes in outcome per SD increase in exposure.

For detailed results see the Excel appendix (Supplementary Table 5).

**Figure S1. Histograms showing distributions of the eight indicators in the five cohorts. The vertical axis indicates the number of individuals in each range.**

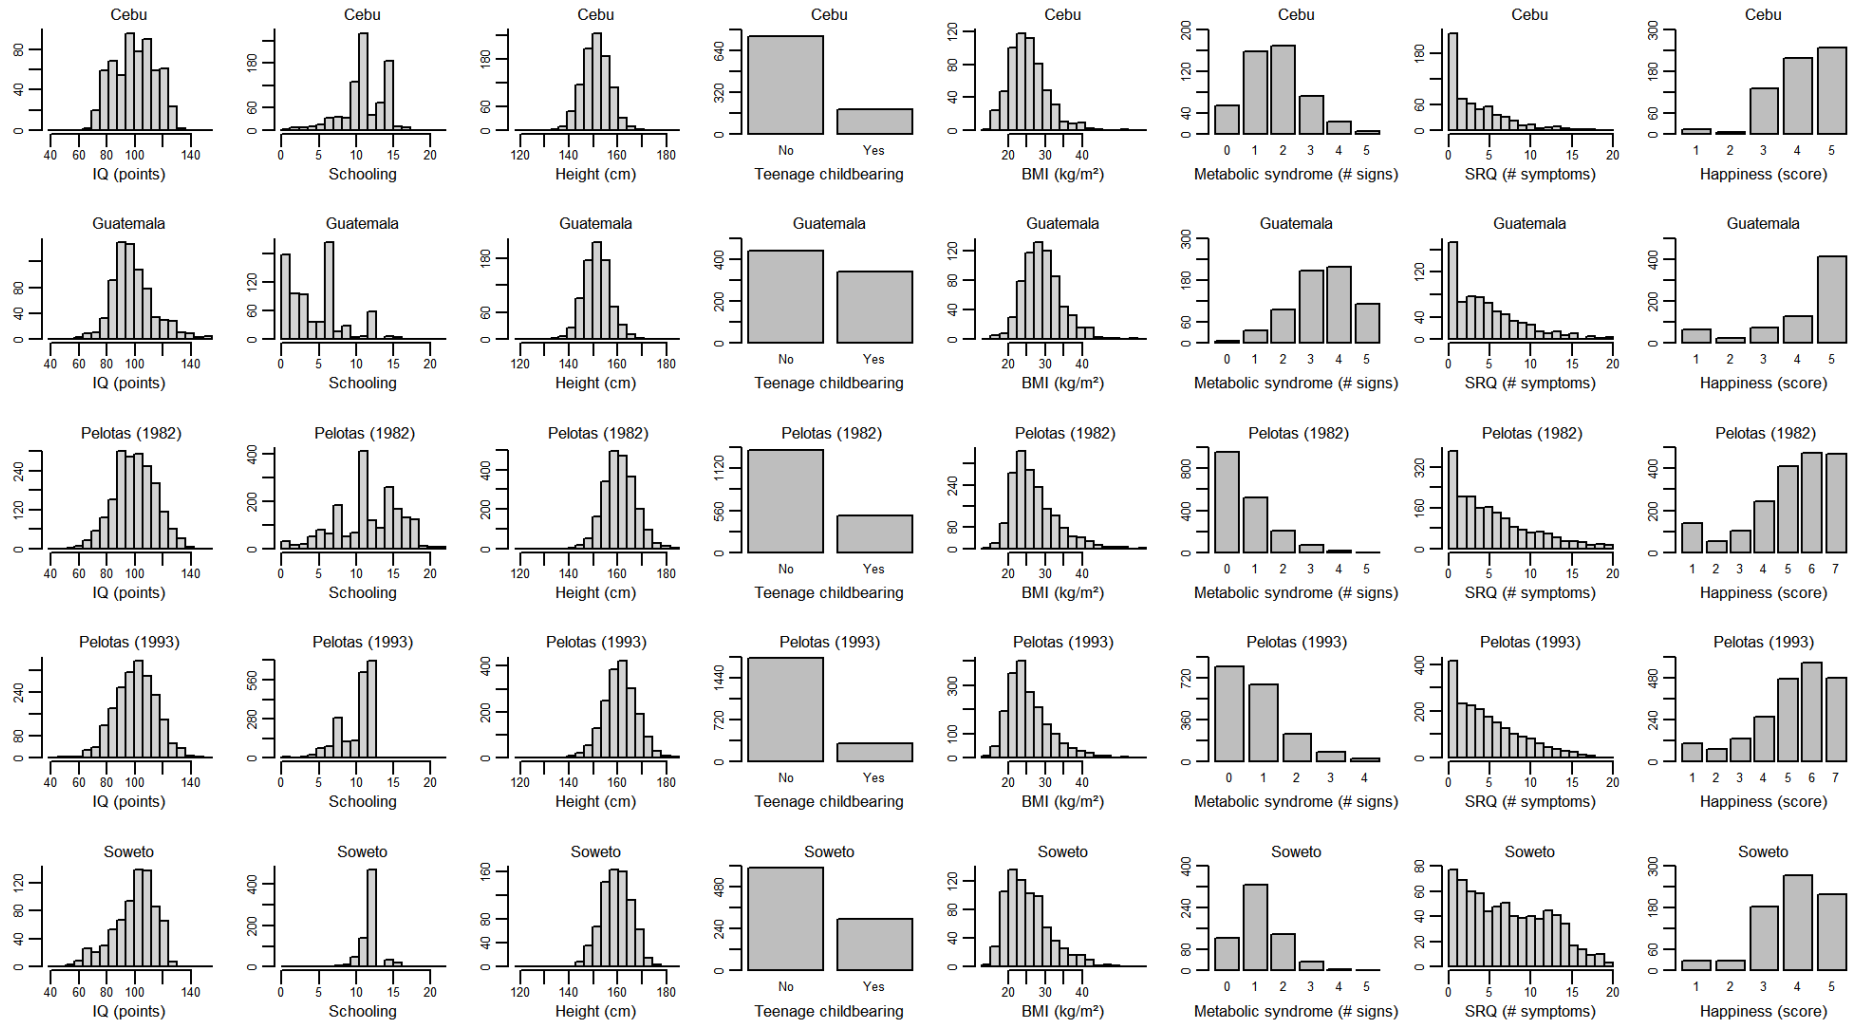

Figure S2. Pairwise Pearson correlation coefficients among outcome variables.

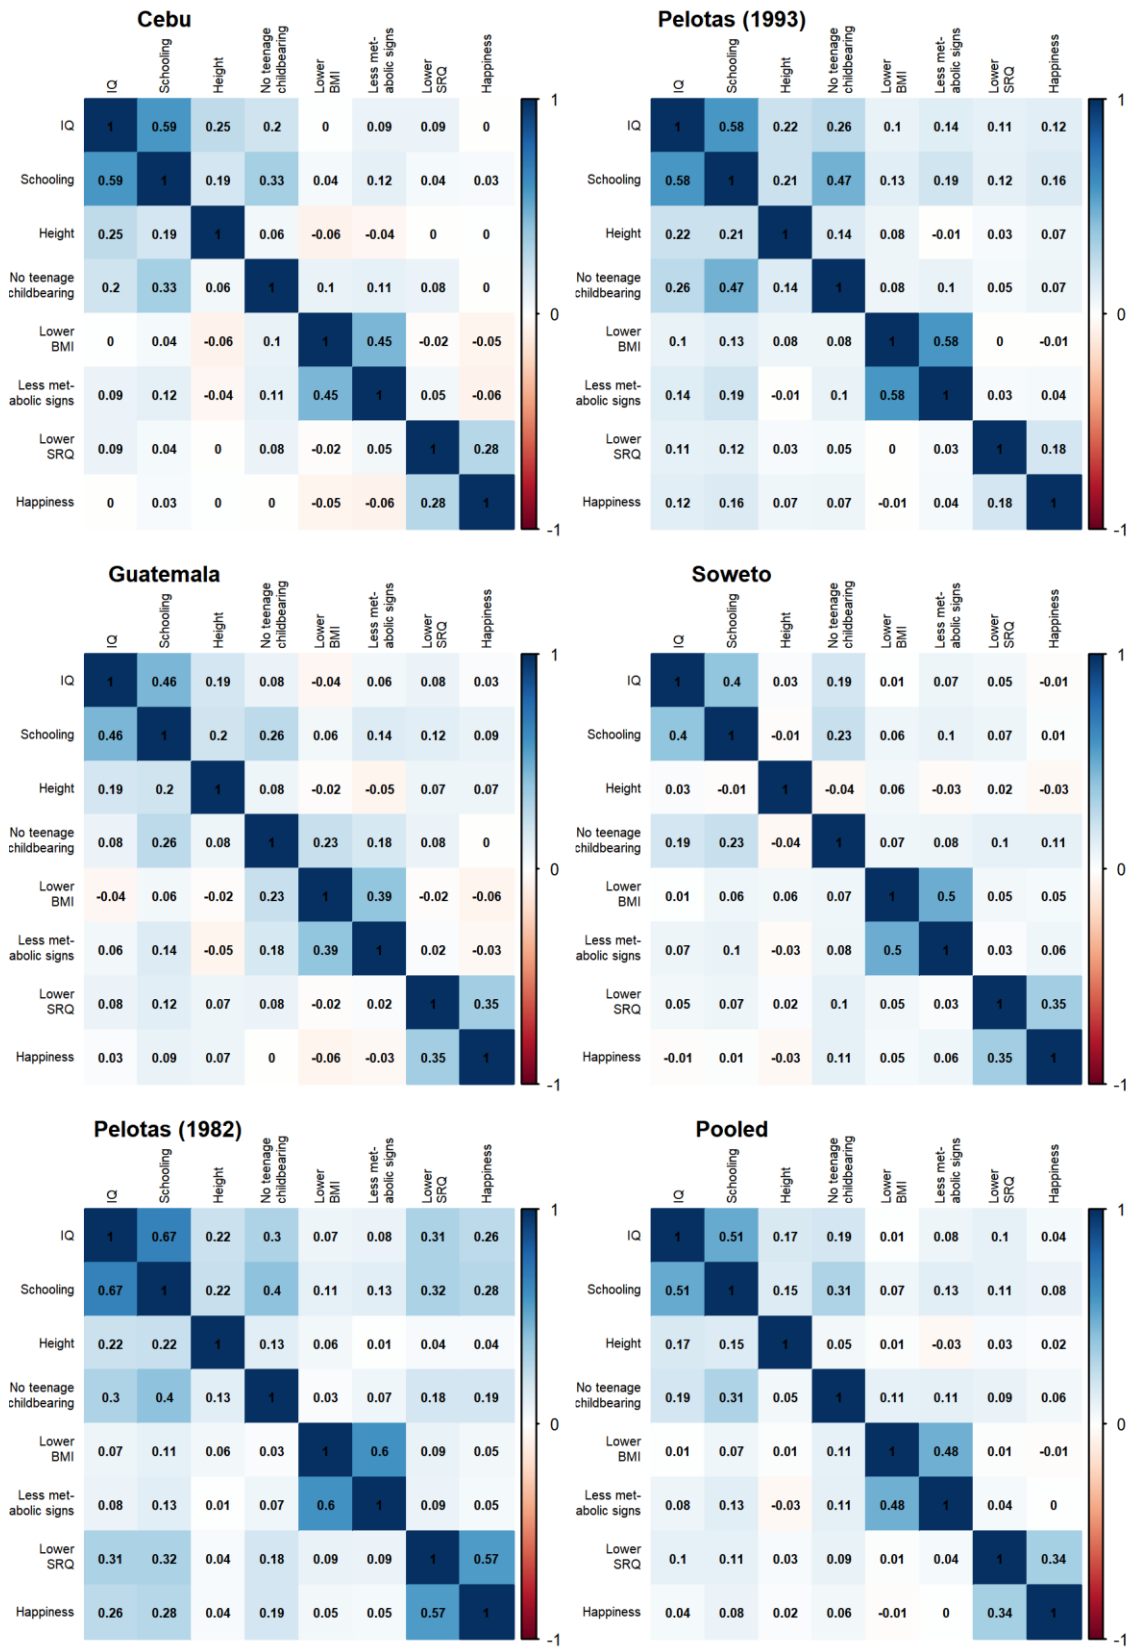

**Figure S3. Pairwise Pearson correlation coefficients of wellbeing components from pooled analyses with outcomes, based on three separate PCA models.**

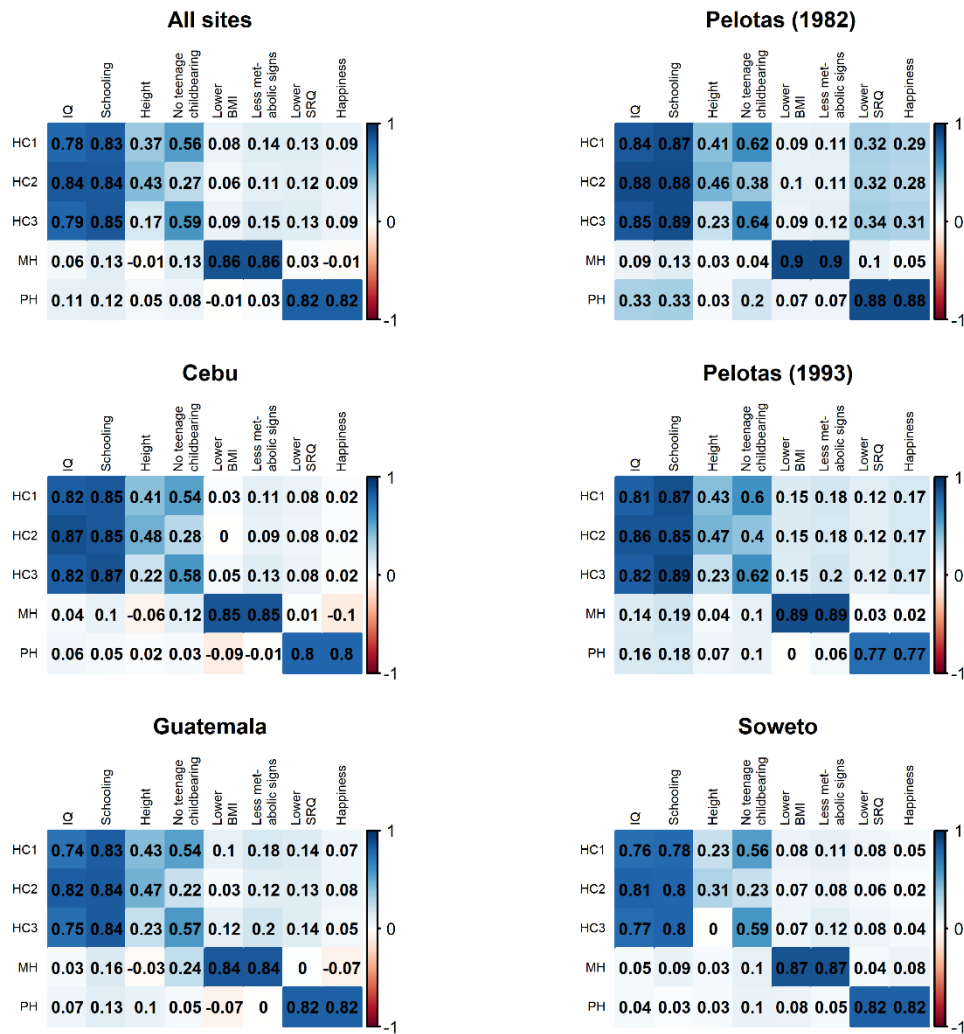

HC: Human capital (HC1: including both height and teenage childbearing; HC2: including only height; HC3: including only teenage childbearing).

MH: metabolic health.

PH: psychological health.



**Figure S4. Overlap of women classified in the upper tercile of each wellbeing component in the pooled analyses.**

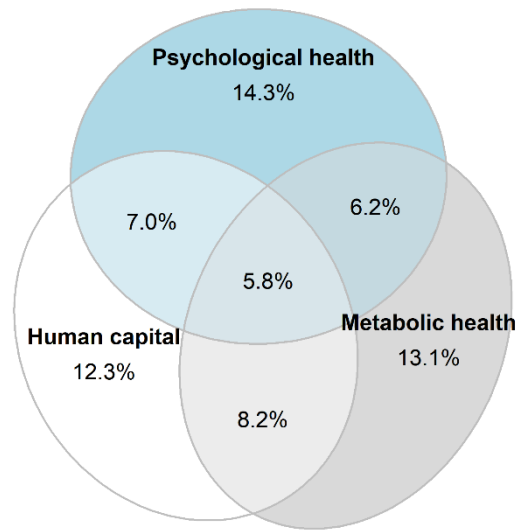

**Figure S5. Pairwise Pearson correlation coefficients of wellbeing components from pooled analyses with outcomes, based on a single PCA model including the eight outcome variables.**

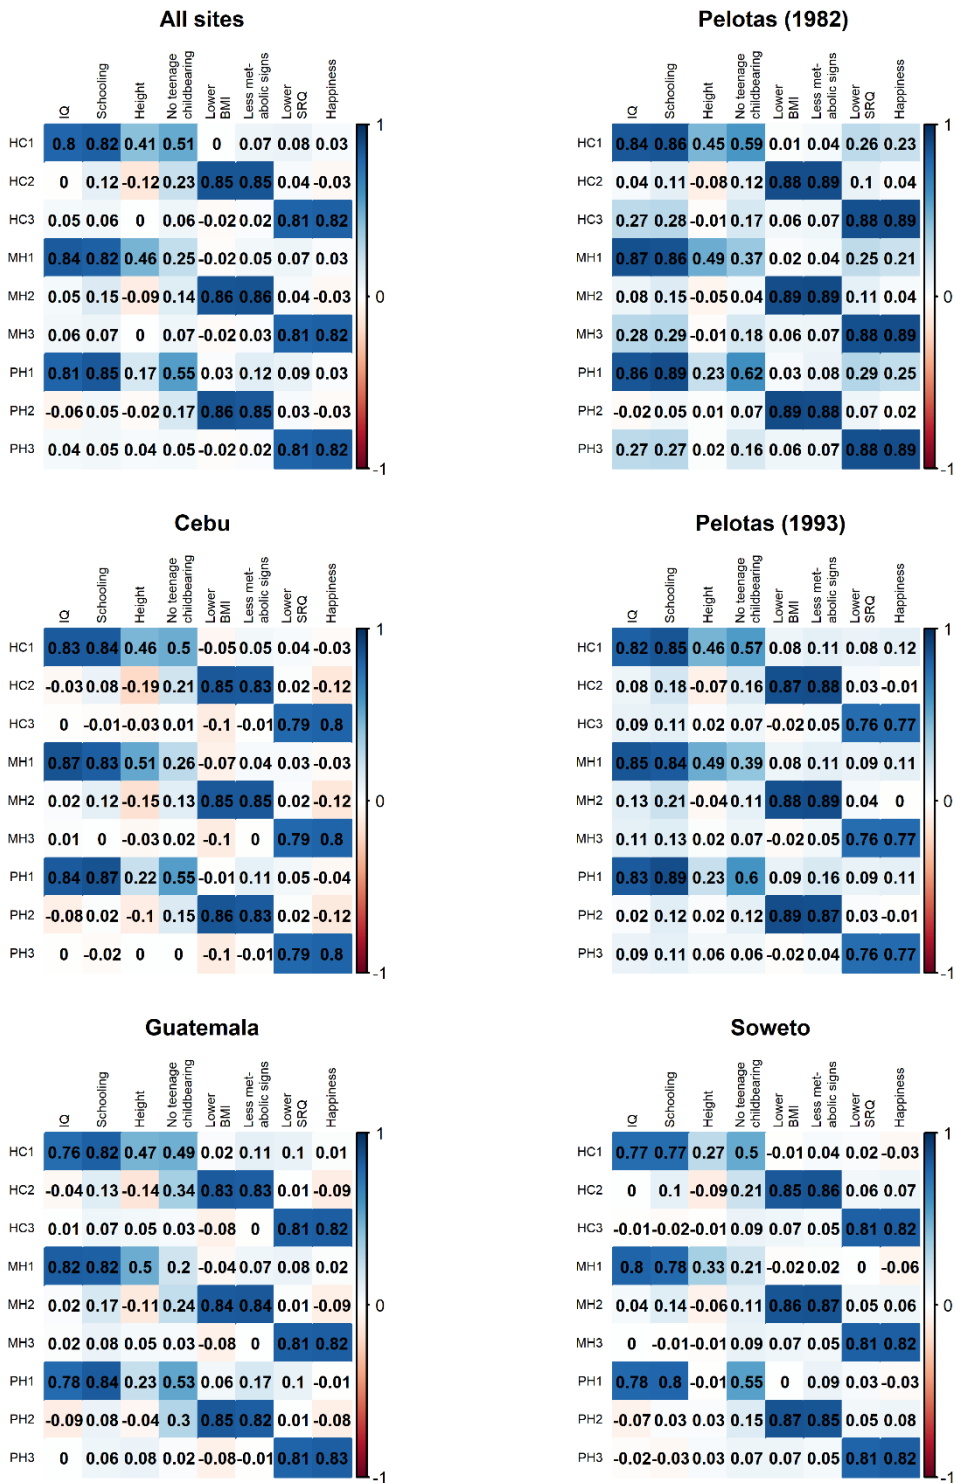

HC: Human capital. MH: metabolic health. PH: psychological health. 1: including both height and teenage childbearing; 2: including only height; 3: including only teenage childbearing.

**Figure S6. Pairwise Pearson correlation coefficients between wellbeing components from pooled (p) and cohort-specific (c) analyses.**

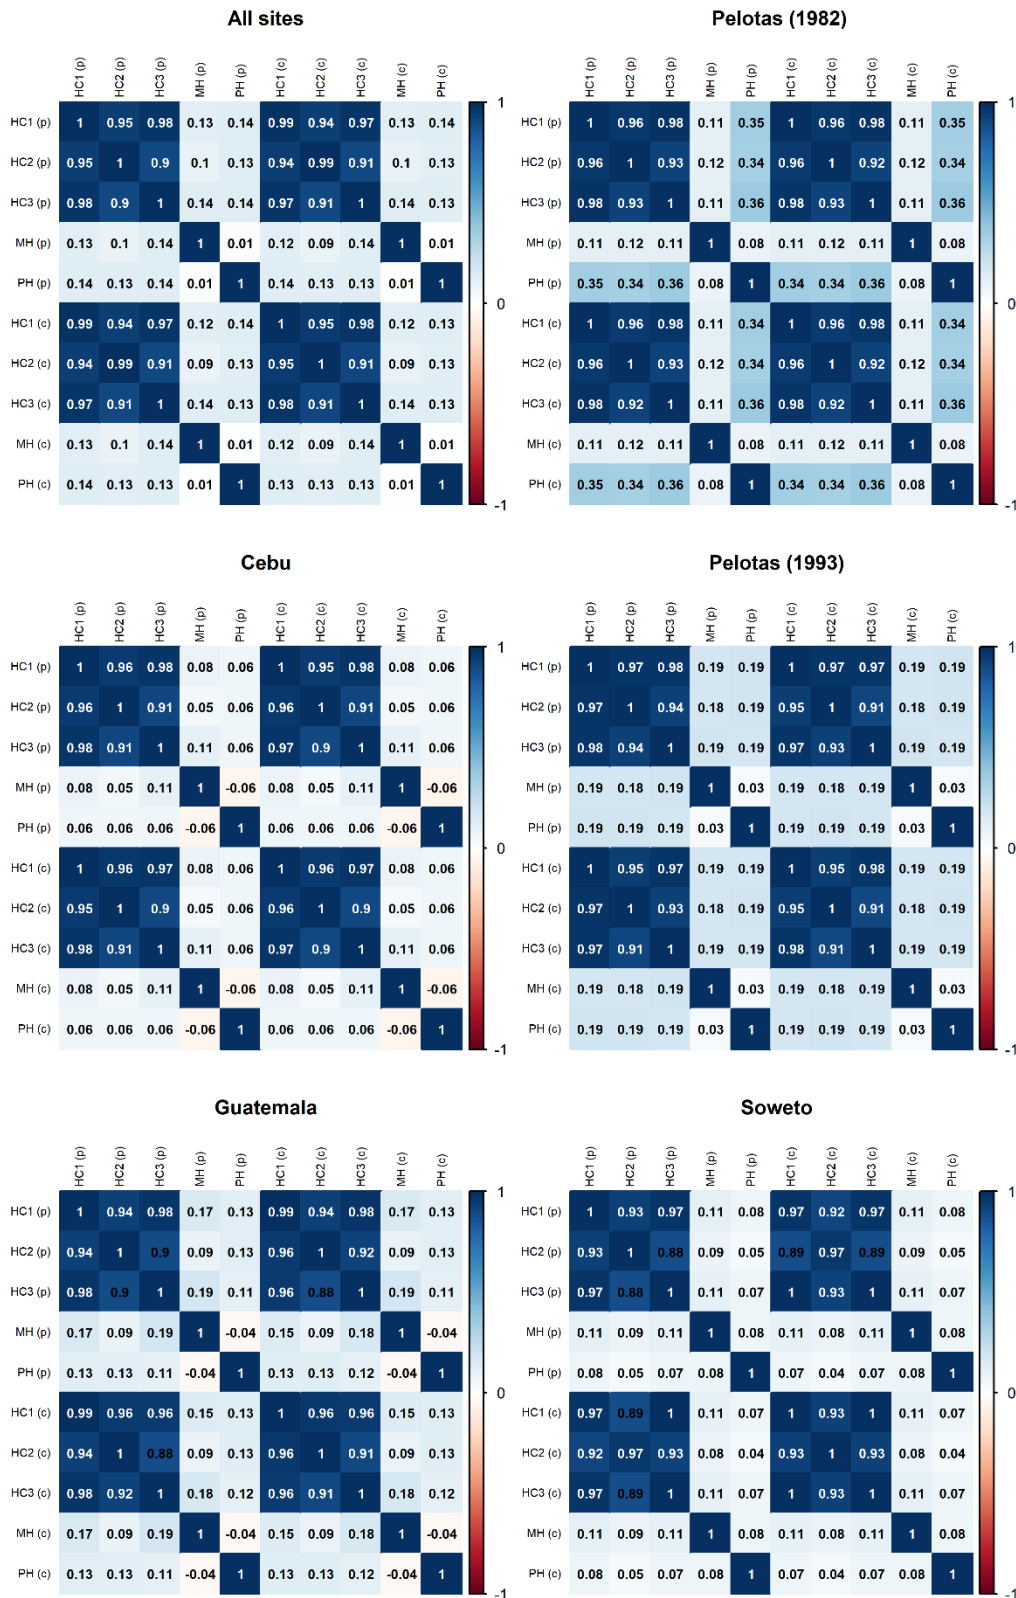

HC: Human capital (HC1: including both height and teenage childbearing; HC2: including only height; HC3: including only teenage childbearing). MH: metabolic health. PH: psychological health.
